# Supplementary material for: Transcriptomic Identification and Expression Profile Analysis of Odorant-Degrading Enzymes from the Asian Corn Borer Moth, Ostrinia furnacalis
Source: MDPI journal article supplement (doi:10.3390/insects13111027), 2022-11-06
Supplement: s1 [file s1]

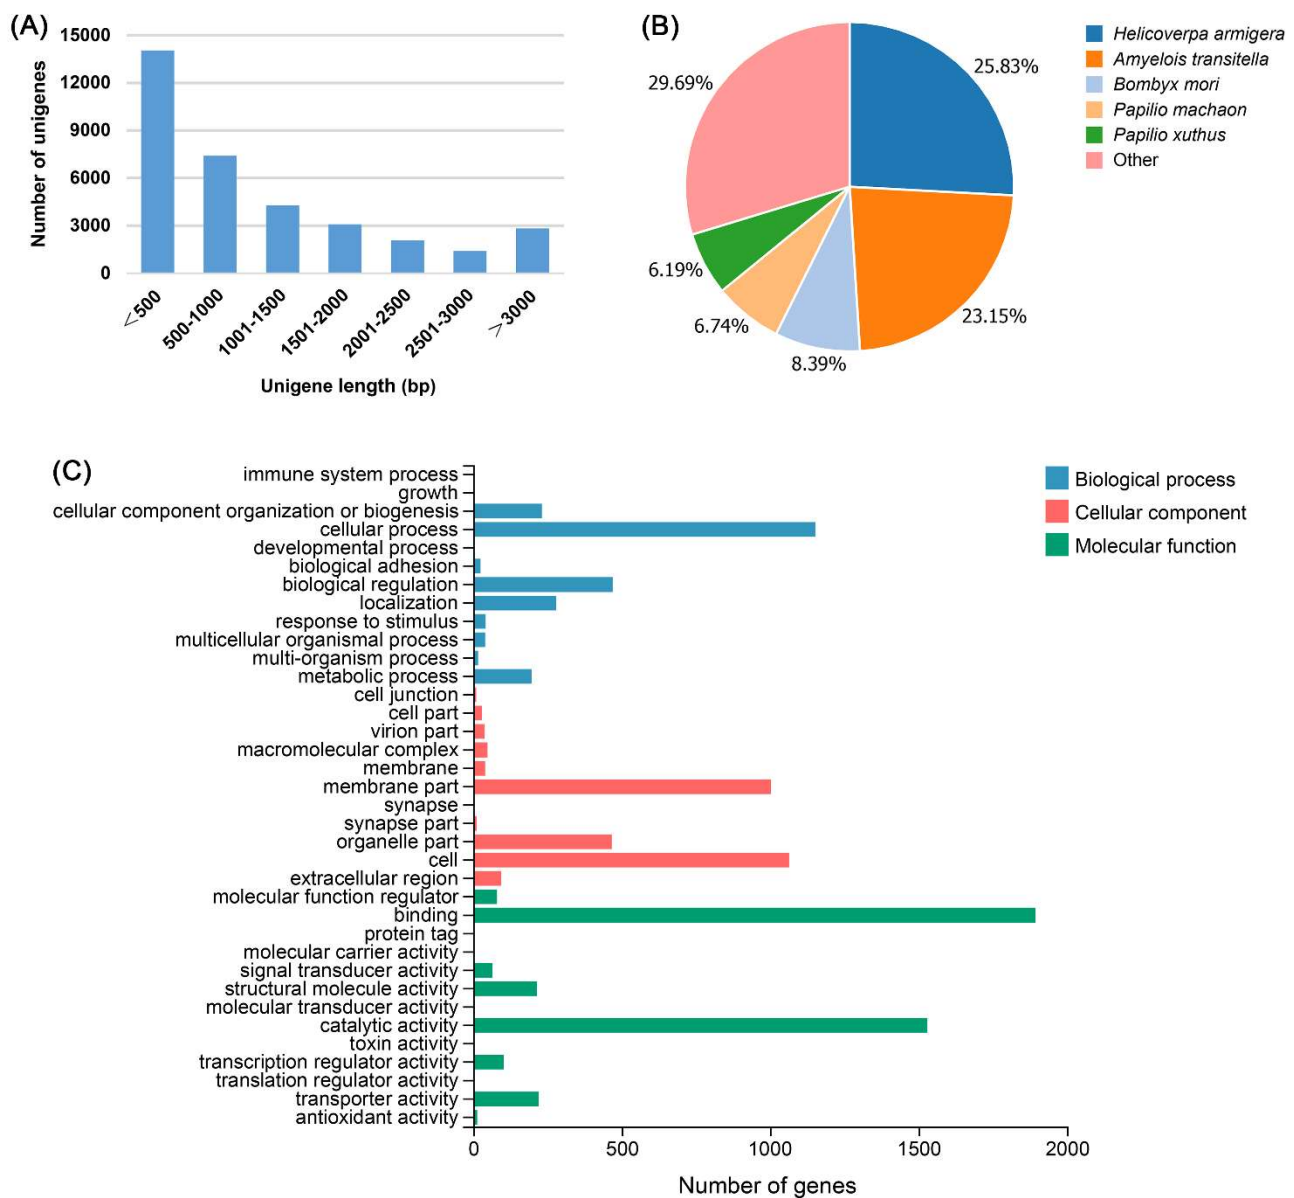

**Figure S1.** Summary of the *Ostrinia furnacalis* unigene assembly. (A) Unigene size distribution. All of the unigene sizes were calculated. (B) Species distribution of the unigenes based on BLASTX results. (C) GO classification of the unigenes.

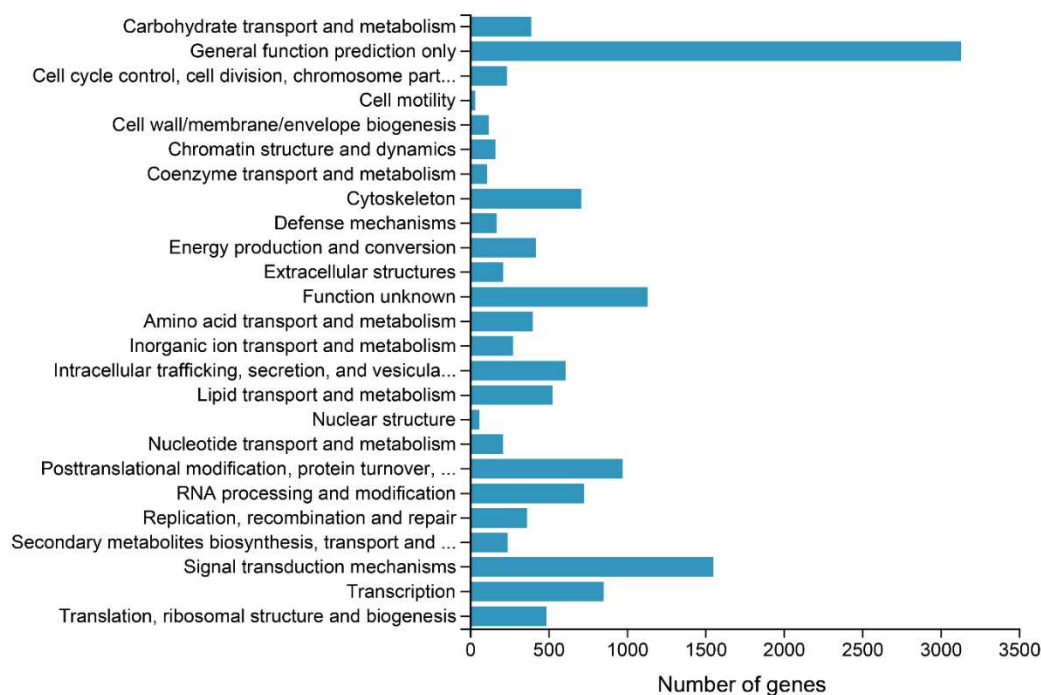

**Figure S2.** KOG classification of the *O. furnacalis* unigenes.

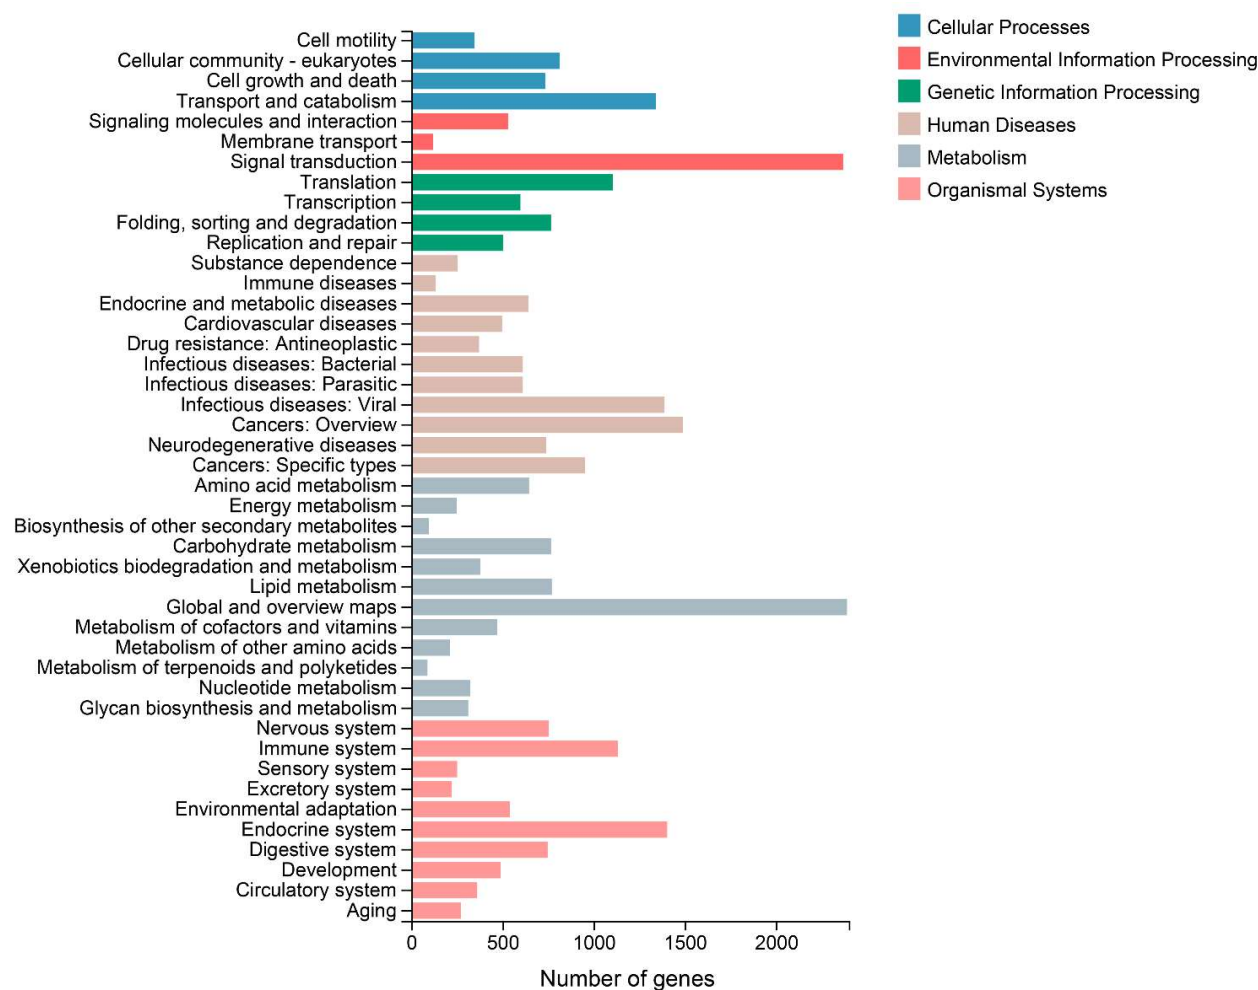

**Figure S3.** KEGG classification of the *O. furnacalis* unigenes.

| N-terminus | Oxyanion<br>hole | GxSxG<br>version | E | H | C-terminus |
|------------|------------------|------------------|---|---|------------|
|            | ↓                | ↓                | ↓ | ↓ |            |
| OfurCCE1   | GTS              | GSSSG            | + | + |            |
| OfurCCE2   | GGC              | GESCG            | + | + |            |
| OfurCCE3   | GGA              | GVSAG            | + | + |            |
| OfurCCE4   | SGA              | GCSAG            | + | + |            |
| OfurCCE5   | GGA              | GCSAG            | + | + |            |
| OfurCCE6   | GGF              | GQGFG            | + | + |            |
| OfurCCE7   | GGA              | GESAG            | + | + |            |
| OfurCCE8   | GGA              | GESAG            | + | + |            |
| OfurCCE9   | GGA              | GESAG            | + | + |            |
| OfurCCE10  | GGA              | GESAG            | + | + |            |
| OfurCCE11  | GGY              | GESYG            | + | + |            |
| OfurCCE12  | GGA              | GYSAG            | + | + |            |
| OfurCCE13  | GGA              | GYSAG            | + | + |            |
| OfurCCE14  | GGA              | GESAG            | + | + |            |
| OfurCCE15  | GGA              | GMSAG            | + | + |            |
| OfurCCE16  | GGA              | GESAG            | + | + |            |
| OfurCCE17  | GGA              | GESAG            | + | + |            |
| OfurCCE18  | GGA              | GESAG            | + | + |            |
| OfurCCE19  | GGA              | GCSAG            | + | + |            |

**Figure S4.** Catalytic motifs of the *O. furnacalis* CCEs.

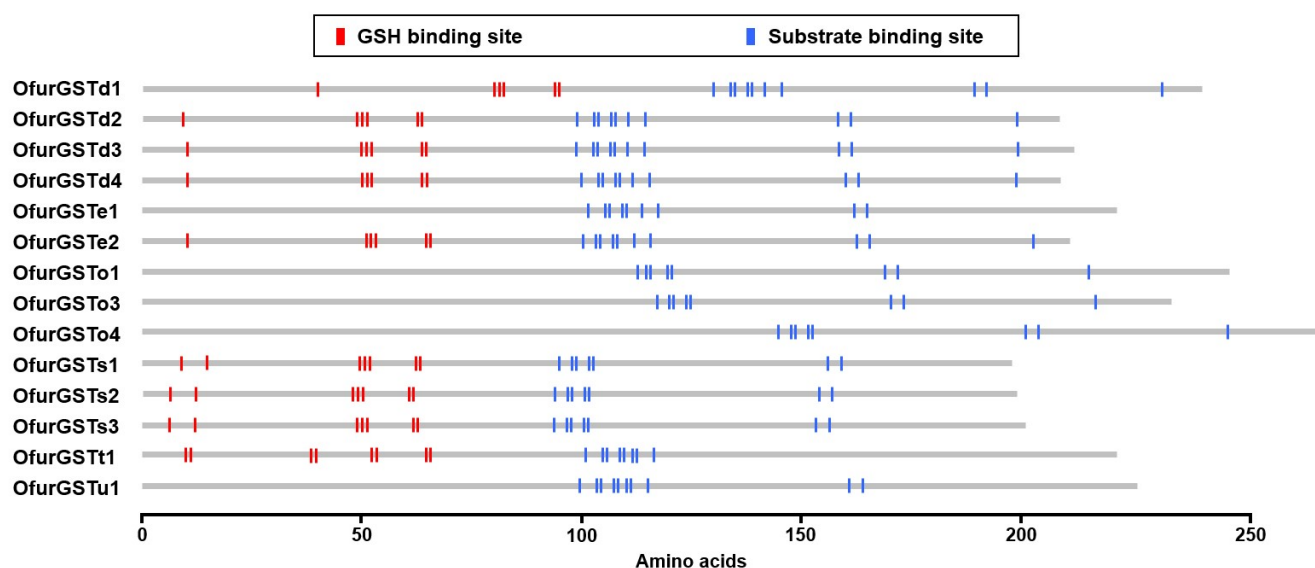

**Figure S5.** Predicted glutathione binding sites (G-sites) and substrate binding sites (H-sites) of the *O. furnacalis* GSTs. OfurGSTe3, OfurGSTo2 and OfurGSTz1 are not shown in this figure since no G-sites and H-sites are predicted in these proteins.

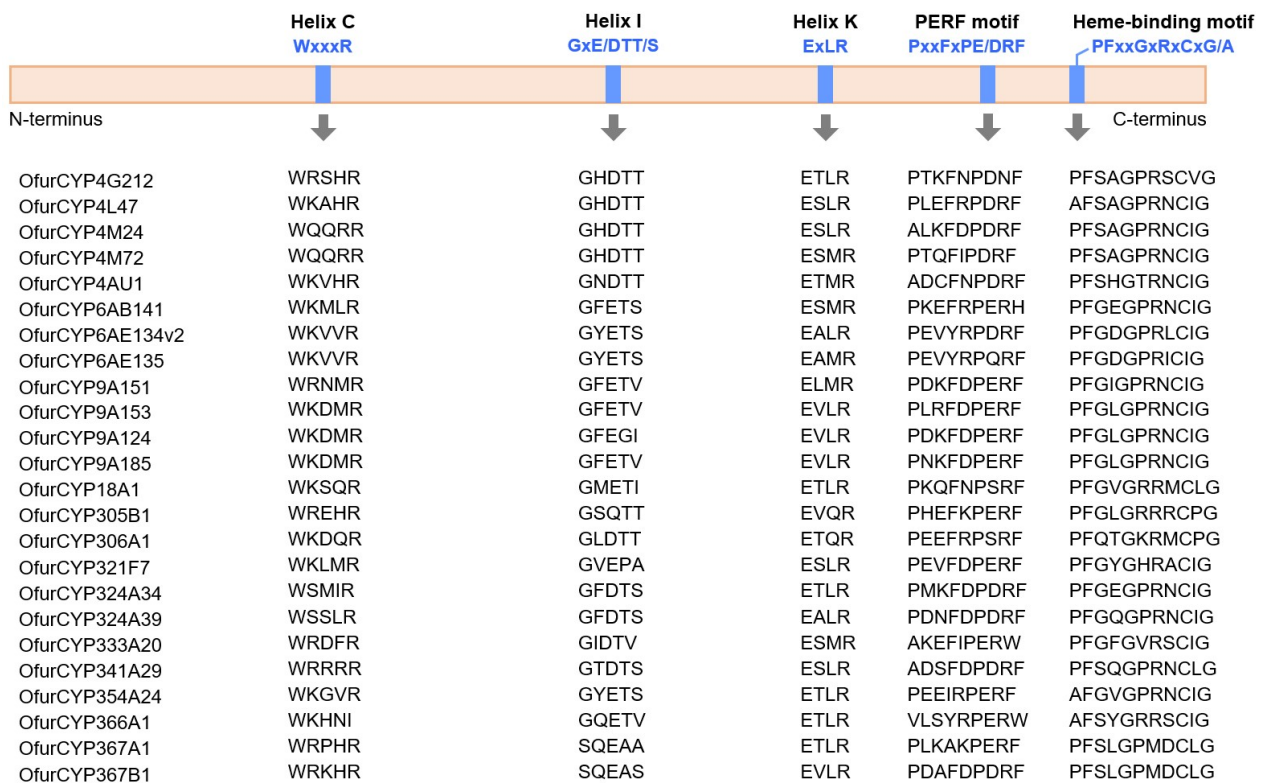

**Figure S6.** Functional domains of the *O. furnacalis* CYPs.

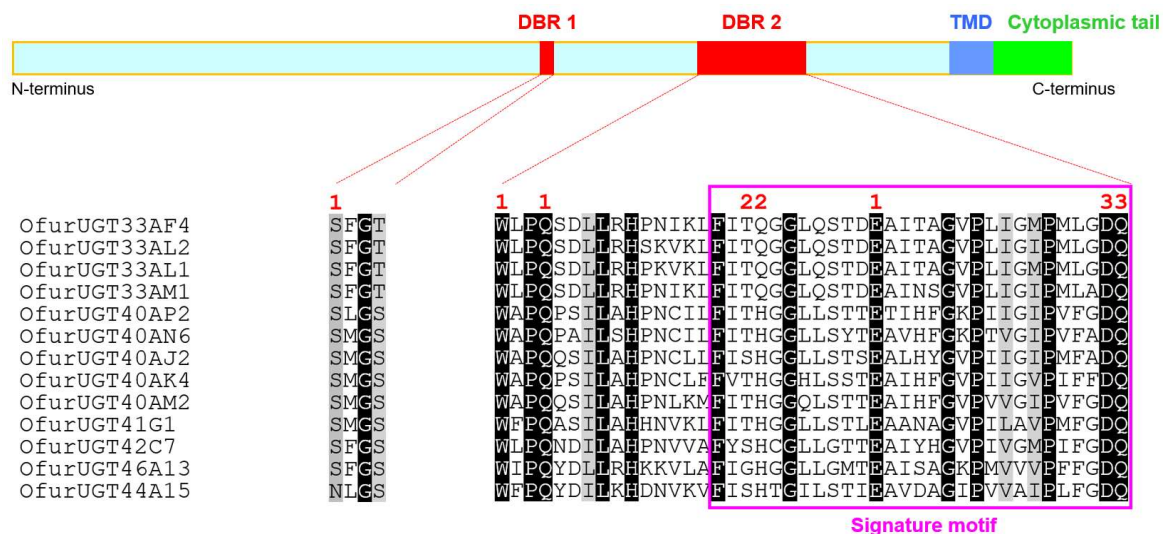

**Figure S7.** Alignment of the functional domains of *O. furnacalis* UGTs. Upper panel: schematic drawing of *O. furnacalis* UGTs. Two sugar donor-binding regions (DBR1 and DBR2), transmembrane domain (TMD) and cytoplasmic tail are shown. Lower panel: alignment of the DBR1 and DBR2 regions. Key amino acid residues interacting with the sugar donor are numbered 1, 2 and 3 in red (1, nucleotide interacting residues; 2, phosphate interacting residues; 3, glucoside interacting residues).
