# Supplementary material for: Transcriptomic Identification and Expression Profile Analysis of Odorant-Degrading Enzymes from the Asian Corn Borer Moth, Ostrinia furnacalis
Source: Insects. 2022 Nov 6;13(11):1027. doi: 10.3390/insects13111027 (PMC9697913; doi:10.3390/insects13111027)
Supplement: Supplementary file 1 [file insects-13-01027-s001.zip]

Archive with 4 entries (4 files):
- Suppl Figures S1-S7.pdf
- Suppl Table S1.xlsx
- Suppl Table S2.xlsx
- Suppl Table S3.xlsx
