# Supplementary material for: Transcriptomic Identification and Expression Profile Analysis of Odorant-Degrading Enzymes from the Asian Corn Borer Moth, Ostrinia furnacalis
Source: Insects. 2022 Nov 6;13(11):1027. doi: 10.3390/insects13111027 (PMC9697913; doi:10.3390/insects13111027)
Supplement: Supplementary file 1 [file insects-13-01027-s001.zip › Suppl Table S1.xlsx]

## Sheet: CCEs
Table S1. GenBank accession numbers of genes used in phylogenetic analyses.
Species	Gene name	GenBank acc. no.
Ostrinia furnacalis	OfurCCE1	LC017760
	OfurCCE2	LC017761
	OfurCCE3	LC017762
	OfurCCE4	LC017763
	OfurCCE5	LC017764
	OfurCCE6	LC017765
	OfurCCE7	LC017766
	OfurCCE8	LC017767
	OfurCCE9	LC017768
	OfurCCE10	LC017769
	OfurCCE11	LC017770
	OfurCCE12	LC017771
	OfurCCE13	LC017772
	OfurCCE14	LC017773
	OfurCCE15	LC017774
	OfurCCE16 to OfurCCE19	This study
Cnaphalocrocis medinalis	CmedCCE1	KP001147
	CmedCCE2	KP001148
	CmedCCE3	KP001149
	CmedCCE4	KP001150
	CmedCCE5	KP001151
	CmedCCE7	KP001153
	CmedCCE8	KP001154
	CmedCCE9	KP001155
	CmedCCE10	KP001156
	CmedCCE11	KP001157
	CmedCCE12	KP001158
	CmedCCE13	KP001159
	CmedCCE16	KY021821
	CmedCCE17	KY021822
	CmedCCE18	KY021823
	CmedCCE19	KY021824
	CmedCCE20	KY021825
	CmedCCE21	KY021826
	CmedCCE22	KY021827
	CmedCCE23	KY021828
	CmedCCE25	KY021830
	CmedCCE26	KY021831
	CmedCCE27	KY021832
	CmedCCE28	KY021833
	CmedCCE29	KY021834
	CmedCCE30	KY021835
Chilo suppressalis	CsupCCE1	KJ023199
	CsupCCE2	KJ023200
	CsupCCE3	KJ023201
	CsupCCE4	KJ023202
	CsupCCE5	KJ023203
	CsupCCE6	KJ023204
	CsupCCE7	KJ023205
	CsupCCE8	KJ023206
	CsupCCE9	KJ023207
	CsupCCE10	KJ023208
	CsupCCE11	KJ023209
	CsupCCE12	KJ023210
	CsupCCE13	KJ023211
	CsupCCE14	KJ023212
	CsupCCE15	KJ023213
	CsupCCE16	KJ023214
	CsupCCE17	KJ023215
	CsupCCE18	KJ023216
	CsupCCE19	KJ023217
	CsupAChE1	EF453724
	CsupAChE2	EF470245
Bombyx mori	BmorCCE030b	BGIBMGA006082
	BmorCCE006a	BGIBMGA003517
	BmorCCE028a	BGIBMGA005805
	BmorCCE026a	BGIBMGA009874
	BmorAChE2	AB161180
	BmorCCE006j	BGIBMGA002796
	BmorCCE006k	BGIBMGA001629
	BmorCCE006l	BGIBMGA001630
	BmorCCE018a	DQ311250
	BmorCCE001d	BGIBMGA010505
	BmorCCE006m	BGIBMGA000875
	BmorCCE032a	BGIBMGA001242
	BmorAChE1	AB189740
	BmorCCE001c	BGIBMGA007545
	BmorCCE001b	BGIBMGA007546
	BmorCCE001a	BGIBMGA007547
	BmorCCE002a	BGIBMGA001841
	BmorCCE007a	BGIBMGA004147
	BmorCCE008a	BGIBMGA004205
	BmorCCE011a	EU523535
	BmorCCE011b	EU727142
	BmorCCE016c	BGIBMGA010976
	BmorCCE016d	BGIBMGA010986
	BmorCCE016a	BGIBMGA010988
	BmorCCE014b	EF017799
	BmorCCE014a	DQ443360
	BmorCCE006b	EU688968
	BmorCCE005a	BGIBMGA000773
	BmorCCE024a	EU328352
	BmorCCE024c	EU647213
	BmorCCE029a	BGIBMGA014463
	BmorJHE	AAL55240
Spodoptera littoralis	SlittCCE1	ABH01081
	SlittCCE2	ACV60229
	SlittCCE3	ACV60230
	SlittCCE4	ACV60231
	SlittCCE5	ACV60232
	SlittCCE6	ACV60233
	SlittCCE7	ACV60234
	SlittCCE8	ACV60235
	SlittCCE9	ACV60236
	SlittCCE10	ACV60237
	SlittCCE11	ACV60238
	SlittCCE12	ACV60239
	SlittCCE13	ACV60240
	SlittCCE14	ACV60241
	SlittCCE15	ACV60242
	SlittCCE16	ACV60243
	SlittCCE17	ACV60244
	SlittCCE18	ACV60245
	SlittCCE19	ACV60246
	SlittCCE20	ACV60247
Spodoptera exigua	SexiCCE4	KC493657
	SexiCCE5	ADR64702
	SexiCCE13	HQ116560
	SexiCCE14	JF728803
	SexiCCE17	ADR64700
	SexiCCE18	AEJ38204
	SexiCCE20	ADR64703
Mamestra brassicae	MbraEST	AY390258
Sesamia nonagrioides	SnonEST	DQ680829
Manduca sexta	MsexJHE	AAG42021
Antheraea polyphemus	ApolPDE	AAX58711
	ApolODE	AAM14415
	ApolIE	AAM14416
Popillia japonica	PjapPDE	AAX58713

## Sheet: GSTs
Species	Gene name	GenBank acc. no.
Bombyx mori	BmorGSTd1	AJ006502
	BmorGSTd2	AB176691
	BmorGSTd3	DQ355374
	BmorGSTe1	AY192575
	BmorGSTe2	DQ355376
	BmorGSTe3	EF506488
	BmorGSTo1	DQ311183
	BmorGSTo2	DQ355373
	BmorGSTo3	DQ443293
	BmorGSTo4	EU216544
	BmorGSTs1	AY297161
	BmorGSTs2	AB206971
	BmorGSTt1	EF506487
	BmorGSTz1	DQ355375
	BmorGSTz2	EF565386
	BmorGSTu1	EF423869
Plutella xylostella	PxylGSTd1	Px010343
	PxylGSTd2	Px015896
	PxylGSTd3	Px015897
	PxylGSTe2	Px010078
	PxylGSTe3	Px011036
	PxylGSTe4	Px006106
	PxylGSTo1	Px016897
	PxylGSTo2	Px016898
	PxylGSTo3	Px007118
	PxylGSTo4	Px015266
	PxylGSTs1	Px009113
	PxylGSTs2	Px009257
	PxylGSTt1	Px000759
	PxylGSTz1	Px003659
	PxylGSTz2	Px001225
	PxylGSTu1	Px000790
Cnaphalocrocis medinalis	CmedGSTd1	KM099178
	CmedGSTd2	KM099179
	CmedGSTd3	KM433686
	CmedGSTe1	KM099180
	CmedGSTe2	KM099181
	CmedGSTe3	KM099182
	CmedGSTe4	KM099183
	CmedGSTo1	KM099186
	CmedGSTo2	KM099187
	CmedGSTo3	KM433691
	CmedGSTs1	KM099188
	CmedGSTs2	KM099189
	CmedGSTz1	KM099191
	CmedGSTz2	KM099192
	CmedGSTu1	KM099193
Spodoptera litura	SlitGSTd1	KF482970
	SlitGSTd2	KF482971
	SlitGSTd3	KF482972
	SlitGSTe1	AY506545
	SlitGSTe2	GQ131803
	SlitGSTe3	GQ131804
	SlitGSTo1	HQ667939
	SlitGSTo2	KF482977
	SlitGSTo3	KF482978
	SlitGSTs1	HQ667936
	SlitGSTs2	HQ667937
	SlitGSTs3	HQ667938
	SlitGSTt1	KF482976
	SlitGSTz1	KF482974
	SlitGSTz2	KF482975
	SlitGSTu1	HQ667940
Drosophila melanogaster	DmelGSTd1	NP_524326
	DmelGSTd2	NP_524912
	DmelGSTd3	NP_788656
	DmelGSTd4	NP_524913
	DmelGSTe1	NP_611323
	DmelGSTe2	NP_611324
	DmelGSTo1	NP_648237
	DmelGSTo2	NP_729388
	DmelGSTo3	NP_648234
	DmelGSTs1	NP_725653
	DmelGSTt1	NP_610509
	DmelGSTt2	NP_724816
	DmelGSTt3	NP_728347
	DmelGSTz1	NP_649894
	DmelGSTz2	NP_649895
Anopheles gambiae	AgamGSTd1	XP_313050
	AgamGSTd2	CAA96104
	AgamGSTe1	XP_319969
	AgamGSTe2	AAG45164
	AgamGSTe3	XP_319972
	AgamGSTo1	XP_315763
	AgamGSTs1	AAM53611
	AgamGSTt1	XP_311299
	AgamGSTt2	XP_316865
	AgamGSTz1	XP_312009
	AgamGSTu1	AAM61888
Tribolium castaneum	TcasGSTd1	XM_969180
	TcasGSTe1	XM_961349
	TcasGSTo1	XM_966025
	TcasGSTo2	XM_966091
	TcasGSTo3	XM_966154
	TcasGSTs1	EFA00385
	TcasGSTs2	XM_965554
	TcasGSTt1	XM_965303
	TcasGSTz1	XM_968448
	TcasGSTu1	XM_969955
Apis mellifera	AmelGSTd1	NP_001171499
	AmelGSTo1	XP_624501
	AmelGSTs1	NP_001153742
	AmelGSTs4	NP_001136128
	AmelGSTt1	XP_624692
Nilaparvata lugens	NlugGSTd1	JQ917469
	NlugGSTe1	JQ917470
	NlugGSTo1	JQ917471
	NlugGSTs1	JQ917468
	NlugGSTs2	JQ917474
	NlugGSTt1	JQ917472
	NlugGSTz1	JQ946073
Acyrthosiphon pisum	ApisGSTd1	AK340504
	ApisGSTo1	AK340396
	ApisGSTs1	AK339849
	ApisGSTs2	AK340693
	ApisGSTt1	AK339936
	ApisGSTt2	AK340178

## Sheet: CYPs
Species	Gene name	GenBank acc. no.
Chilo suppressalis	CsupCYP4AU10	KF701166
	CsupCYP4AU11	KF701167
	CsupCYP4G90	KF701159
	CsupCYP4G91	KF701160
	CsupCYP4L27	KF701162
	CsupCYP4M38	KF701163
	CsupCYP4M39	KF701164
	CsupCYP6AB45	KF701129
	CsupCYP6AB48	KF701132
	CsupCYP6AB46	KF701130
	CsupCYP6AB47	KF701131
	CsupCYP6AB49	KF701190
	CsupCYP6AB50	KF701133
	CsupCYP6AB51	KF701134
	CsupCYP6AB52	KF701135
	CsupCYP6AB53	KF701136
	CsupCYP6AW1	KF701139
	CsupCYP6CT1	KF701140
	CsupCYP6CV4	KF701141
	CsupCYP6CV5	KF701142
	CsupCYP9A68	KF701145
	CsupCYP9A69	KF701146
	CsupCYP18A1	KF701122
	CsupCYP301A1	KF701181
	CsupCYP306A1	KF701127
	CsupCYP307A2	KF701128
	CsupCYP321F1	KF701152
	CsupCYP321F2	KF701153
	CsupCYP321F3	KF701154
	CsupCYP338A1	KF701157
	CsupCYP341A15	KF701170
	CsupCYP367A9	KF701176
The accession numbers of CYPs from Chilo suppressalis are listed here; CYPs from other insect species are downloaded from the P450 homepage (http://drnelson.uthsc.edu/cytochromeP450.html).

## Sheet: UGTs
Species	Gene name	GenBank acc. no.
Bombyx mori	BmorUGT33D1	AEW43145
	BmorUGT33D2	AEW43146
	BmorUGT33D3	AEW43147
	BmorUGT33D4	AEW43148
	BmorUGT33D5	AEW43149
	BmorUGT33D6	AEW43150
	BmorUGT33D7	AEW43151
	BmorUGT33D8	AEW43152
	BmorUGT33K1	AEW43153
	BmorUGT33N1	AEW43154
	BmorUGT33Q1	AEW43155
	BmorUGT39B1	AEW43161
	BmorUGT39C1	AEW43162
	BmorUGT40B1	AEW43164
	BmorUGT40B2P	AEW43165
	BmorUGT40B3	AEW43166
	BmorUGT40B4	AEW43167
	BmorUGT40G1	AEW43168
	BmorUGT40G2	AEW43169
	BmorUGT40H1	AEW43170
	BmorUGT40K1	AEW43171
	BmorUGT40N1	AEW43172
	BmorUGT40P1	AEW43173
	BmorUGT40S1	AEW43174
	BmorUGT41A1	AEW43175
	BmorUGT41A2	AEW43176
	BmorUGT41A3	AEW43177
	BmorUGT42A1	AEW43178
	BmorUGT42A2	AEW43179
	BmorUGT42B1	AEW43180
	BmorUGT43B1	AEW43181
	BmorUGT44A1	AEW43182
	BmorUGT46A1	AEW43183
	BmorUGT46A2	AEW43184
	BmorUGT46C2	AEW43185
	BmorUGT47A1	AEW43186
	BmorUGT50A1	AEW43188
	BmorUGT340C1	AEW43158
	BmorUGT340C2	AEW43159
Spodoptera littoralis	SlittUGT33B13	KF777109
	SlittUGT33F4	KF777110
	SlittUGT33J2	KF777111
	SlittUGT33T2	KF777112
	SlittUGT40U1	KF777113
	SlittUGT40L2	KF777114
	SlittUGT40R3	KF777115
	SlittUGT40R2	KF777116
	SlittUGT41D2	KF777117
	SlittUGT42B4	KF777118
	SlittUGT46A6	KF777119
Spodoptera exigua	SexiUGT33B14	KU680280
	SexiUGT33B15	KU680281
	SexiUGT33B16	KU680282
	SexiUGT33F5	KU680283
	SexiUGT33F6	KU680284
	SexiUGT33F7	KU680285
	SexiUGT33F8	KU680286
	SexiUGT33J3	KU680287
	SexiUGT33T3	KU680288
	SexiUGT33V1	KU680289
	SexiUGT33V2	KU680290
	SexiUGT33V3	KU680291
	SexiUGT33V4	KU680292
	SexiUGT39B4	KU680293
	SexiUGT40D3	KU680294
	SexiUGT40D5	KU680295
	SexiUGT40F3	KU680296
	SexiUGT40F4	KU680297
	SexiUGT40F5	KU680298
	SexiUGT40L3	KU680299
	SexiUGT40M2	KU680300
	SexiUGT40M3	KU680301
	SexiUGT40Q2	KU680302
	SexiUGT40R4	KU680303
	SexiUGT40U2	KU680304
	SexiUGT42B5	KU680305
	SexiUGT42C2	KU680306
	SexiUGT43A2	KU680307
	SexiUGT44A5	KU680308
	SexiUGT46A7	KU680309
	SexiUGT50A5	KU680311
Plutella xylostella	PxUGT33Y1-1	AUC64268
	PxUGT40Y1	AUC64269
	PxUGT47A5	AUC64270
	PxUGT41F1	AUC64271
	PxUGT46E1	AUC64272
	PxUGT42E1	AUC64273
	PxUGT42E2	AUC64274
	PxUGT39B8	AUC64275
	PxUGT40W1	AUC64276
	PxUGT33AA4	AUC64277
	PxUGT42F1	AUC64278
	PxUGT39A2	AUC64279
	PxUGT44A6	AUC64280
	PxUGT40V1	AUC64281
	PxUGT33AB1-1	AUC64282
	PxUGT33Y1-2	AUC64283
	PxUGT33AB1-2	AUC64285
	PxUGT45B1	AUC64286
	PxUGT33W1	AUC64287
	PxUGT50A6	AUC64288
	PxUGT33AA1	AUC64289
	PxUGT40X1	AUC64290
Chilo suppressalis	CsupUGT33AF1	MK135471
	CsupUGT33AG1	MK135472
	CsupUGT33AG2	MK135473
	CsupUGT33AG3	MK135474
	CsupUGT39B10	MK135477
	CsupUGT39B9	MK135478
	CsupUGT40AJ1	MK135479
	CsupUGT40AK1	MK135480
	CsupUGT40AK2	MK135481
	CsupUGT40AK3	MK135482
	CsupUGT40AL1	MK135483
	CsupUGT40AM1	MK135484
	CsupUGT40AN1	MK135485
	CsupUGT40AN2	MK135486
	CsupUGT40AP1	MK135487
	CsupUGT42C4	MK135488
	CsupUGT42H1	MK135489
	CsupUGT44A8	MK135490
	CsupUGT45C1	MK135491
	CsupUGT46A9	MK135492
	CsupUGT47A7	MK135493
	CsupUGT50A8	MK135494
Athetis lepigone	AlepUGT33AD1 to AlegUGT46B2	Zhang et al. Journal of Asia-Pacific Entomology, 2017, 20: 253-259

## Sheet: AOXs
Species	Gene name	GenBank acc. no.
Helicoverpa armigera	HarmAOX1 to HarmAOX6	Xu and Liao. The Science of Nature, 2017, 104: 94
Cnaphalocrocis medinalis	CmedAOX1	KY595778
	CmedAOX2	KY595779
	CmedAOX3	KY595780
	CmedAOX4	KY595781
Amyelois transitella	AtraAOX2	AGQ43599
Bombyx mori	BmorAOX1	NP_001103812
	BmorAOX2	NP_001103811
	BmorAOX5	AQY62686
Sesamia inferens	SinfAOX1	AII21996
	SinfAOX2	AII21997
	SinfAOX3	AII21998
Cydia pomonella	CpomAOX1	AKQ06145
	CpomAOX2	AKQ06146
Plutella xylostella	PxylAOX2	He et al. BMC Genomics, 2017, 18: 219
	PxylAOX3
Papilio xuthus	PxutAOX2	KPJ03063
Operophtera brumata	ObruAOX1-1	KOB70107
	ObruAOX1-2	KOB70290
Culex quinquefasciatus	CquiAOX	AAF87601
Aedes aegypti	AaegAOX	XP_001654511
Anopheles gambiae	AgamAOX	XP_316291
Drosophila melanogaster	DmelAOX1	AAF55207
	DmelAOX2	AAF55208
	DmelAOX3	AAF55209
	DmelAOX4	AAF55210
Tribolium castaneum	TcasAOX1	XP_008190865
	TcasAOX2	EFA11446
	TcasAOX3	EFA13013
