# Supplementary material for: Transcriptomic Identification and Expression Profile Analysis of Odorant-Degrading Enzymes from the Asian Corn Borer Moth, Ostrinia furnacalis
Source: Insects. 2022 Nov 6;13(11):1027. doi: 10.3390/insects13111027 (PMC9697913; doi:10.3390/insects13111027)
Supplement: Supplementary file 1 [file insects-13-01027-s001.zip › Suppl Table S2.xlsx]

## Sheet: Sheet1
Table S2. Primers used in RT-qPCR.
Primer name	Sequence (5’ to 3’)
CCE1qF	CTCAGGAGGTTCTGCTGTCC
CCE1qR	CAAAGCTTGCTGCGTAGGAT
CCE2qF	CTCCCAGTGATGGTCTGGAT
CCE2qR	GAGGAATCCAAGAACGCCTA
CCE3qF	GTGGCGATCCCAATAATGTT
CCE3qR	TGCCCAGGGTAGTAAAGTCG
CCE4qF	GTTCTTCGATTTCGGCTACG
CCE4qR	GCTGATGATGTACGGCACTG
CCE5qF	CATAGCGTTCAGTGGCTCAG
CCE5qR	GGCCTGTACTTGAGGCAGTC
CCE6qF	CTGACCTCCAGGGTTAACGA
CCE6qR	CACTACGACGATCCCTTGCT
CCE7qF	AAGTGGCTCAGGAGATGACG
CCE7qR	CATTTCCAGGGACCTCTTCA
CCE8qF	CGTAAGCCATGGACAGGAAT
CCE8qR	AGGTTTCTCTGGCGTCATGT
CCE9qF	GAATGGATGACTGGCATGTG
CCE9qR	AACTGGACCCATTTCCATTG
CCE10qF	GTGATGACGACGTTGTGGAC
CCE10qR	GCTGATGCTGAGCTCCTTGT
CCE11qF	ACCGAACCGTTCAATGCTAC
CCE11qR	GACCATGACTGGCAGCTTCT
CCE12qF	CCAAATGGGATATGGCAACT
CCE12qR	CCTGGAATGTCATTGGTTCC
CCE13qF	GTGCATGGAGGAGCATACCA
CCE13qR	GTGAACTCCGAGGCGATAGT
CCE14qF	ATACCGTACGGGACTGTGGA
CCE14qR	GGTGATGGAGGACTTGCCTA
CCE15qF	CACATTCCCTACGCCTCTGT
CCE15qR	CTCCTGCCCGATAGGGTAAT
CCE16qF	GACGATCACATACGCTGCAC
CCE16qR	GACCATGACTGGCAAAGGTT
CCE17qF	CTGGGCATATGGATGAGCTT
CCE17qR	GTCAGGTGTGGGATTTCCAG
CCE18qF	ATGAGCCGATGACTCCATTC
CCE18qR	CTTCAAGCAGCCTTCGTCTT
CCE19qF	AATTCGTTACGGAACCACCA
CCE19qR	GGACAATATGCCTGATGCAA
RPS3qF	GTGCCAAGTCGATGAAGTTC
RPS3qR	CCACGGAAGCATGATCTTTAC
ActinqF	CCGTCCTCCTGACCGAGGCTC
ActinqR	GGTGTGGGAGACACCATCTCCG
