# Supplementary material for: Transcriptomic Identification and Expression Profile Analysis of Odorant-Degrading Enzymes from the Asian Corn Borer Moth, Ostrinia furnacalis
Source: Insects. 2022 Nov 6;13(11):1027. doi: 10.3390/insects13111027 (PMC9697913; doi:10.3390/insects13111027)
Supplement: Supplementary file 1 [file insects-13-01027-s001.zip › Suppl Table S3.xlsx]

## Sheet: CXEs
Table S3. Putative odorant-degrading enzymes identified in O. furnacalis antennae.
Gene name	GenBank acc. no.	Length (aa)	ORF	SP	Mw (kDa)	pI	BLASTX best match
							Species/Protein name	GenBank acc. no.	E-value	Identity (%)
OfurCCE16	MN149544	547	Complete	Yes	62	6.1	Chilo suppressalis CXE	AQY62716	0	62
OfurCCE17	MN149545	700	Complete	No	78	4.7	Cnaphalocrocis medinalis CXE	AIY69037	0	73
OfurCCE18	MN149546	564	Complete	Yes	64	5.7	Cnaphalocrocis medinalis CXE	AQY62724	0	80
OfurCCE19	MN149547	529	Complete	No	60	5.4	Bombyx mandarina CXE	XP_028034249	0	66
aa: amino acid residues
ORF: open reading frame
SP: signal peptide
Mw: molecular weight
pI: isoelectric point

## Sheet: GSTs
Gene name	GenBank acc. no.	Length (aa)	ORF	SP	Mw (kDa)	pI	BLASTX best match
							Species/Protein name	GenBank acc. no.	E-value	Identity (%)
OfurGSTd1	MN122318	248	Complete	Yes	28	5.7	Cnaphalocrocis medinalis GST	AIL29308	4e-142	77
OfurGSTd2	MN122319	215	Complete	No	24	7	Chilo suppressalis GST	AKS40339	1e-129	82
OfurGSTd3	MN122320	218	Complete	No	24	4.8	Ostrinia furnacalis GST	AHV85207	1e-144	98
OfurGSTd4	MN122321	215	Complete	No	24	6.3	Cnaphalocrocis medinalis GST	AIL29324	2e-129	88
OfurGSTe1	MN122322	228	Complete	No	26	8.8	Cnaphalocrocis medinalis GST	AIL29311	2e-123	73
OfurGSTe2	MN122323	218	Complete	No	24	5	Cnaphalocrocis medinalis GST	AIL29312	2e-122	76
OfurGSTe3	MN122324	217	Complete	No	25	7	Cydia pomonella GST	ARM39003	3e-86	61
OfurGSTo1	MN122325	254	Complete	No	29	6.2	Heortia vitessoides GST	AWX68890	9e-176	91
OfurGSTo2	MN122326	286	Complete	No	33	6.2	Bombyx mori GST	ABD36306	4e-122	62
OfurGSTo3	MN122327	240	Complete	No	29	6.4	Cnaphalocrocis medinalis GST	AIZ46903	2e-168	93
OfurGSTo4	MN122328	276	Complete	No	32	6.9	Heortia vitessoides GST	AWX68891	1e-122	63
OfurGSTs1	MN122329	206	Complete	No	23	5.8	Heortia vitessoides GST	AVC05621	2e-112	79
OfurGSTs2	MN122330	203	Complete	No	23	8.7	Heortia vitessoides GST	AWX68889	4e-114	78
OfurGSTs3	MN122331	206	Complete	No	24	6.1	Chilo suppressalis GST	AKS40349	7e-81	59
OfurGSTt1	MN122332	228	Complete	No	27	8.4	Chilo suppressalis GST	AKS40350	1e-116	69
OfurGSTz1	MN122333	214	Complete	No	25	7.6	Cydia pomonella GST	ARM39005	9e-149	93
OfurGSTu1	MN122334	233	Complete	No	27	6.3	Heortia vitessoides GST	AWX68896	7e-152	86

## Sheet: CYPs
Gene name	GenBank acc. no.	Length (aa)	ORF	TMD	Mw (kDa)	pI	BLASTX best match
							Species/Protein name	GenBank acc. no.	E-value	Identity (%)
CYP4G212	MT039794	560	Complete	Yes	64	8.6	Chilo suppressalis CYP4G90	AHW57329	0	92
CYP4L47	MT039795	491	Complete	Yes	56	6	Cnaphalocrocis medinalis CYP4L18	CAX94851	0	69
CYP4M24	MT039796	501	Complete	Yes	58	8.8	Cnaphalocrocis medinalis CYP4M25	AJN91184	0	69
CYP4M72	MT039797	503	Complete	Yes	58	8.6	Chilo suppressalis CYP4M38	AHW57333	0	64
CYP4AU1	MT039798	489	Complete	Yes	57	8.6	Helicoverpa armigera CYP4AU1	AID54874	0	74
CYP6AB141	MT039799	518	Complete	Yes	59	8.9	Chilo suppressalis CYP6AB51	AHW57304	0	64
CYP6AE134v2	MT039800	525	Complete	Yes	61	7.6	Cnaphalocrocis medinalis CYP6AE30	CBB07053	0	58
CYP6AE135	MT039801	525	Complete	Yes	61	8.9	Cnaphalocrocis medinalis CYP6AE30	CBB07053	0	59
CYP9A124	MT039802	533	Complete	Yes	61	7.6	Cnaphalocrocis medinalis CYP9A80	AJN91177	0	71
CYP9A151	MT039803	483	Complete	Yes	56	7.7	Heortia vitessoides CYP9A79	QBA57468	0	71
CYP9A153	MT039804	531	Complete	Yes	61	8.6	Cnaphalocrocis medinalis CYP9A38	CAZ65619	0	70
CYP9A185	MT039805	532	Complete	Yes	61	8.4	Bombyx mandarina CYP9A19	ABQ08710	0	70
CYP18A1	MT039806	535	Complete	Yes	61	7	Heortia vitessoides CYP18A1	QBA57479	0	87
CYP305B1	MT039807	485	Complete	No	55	9	Cnaphalocrocis medinalis CYP305B1	AJN91165	6e-142	84
CYP306A1	MT039808	538	Complete	No	61	6.5	Spodoptera littoralis CYP306A1	ACM45975	0	82
CYP321F7	MT039809	498	Complete	Yes	58	8.7	Cnaphalocrocis medinalis CYP321F5	AJN91178	0	75
CYP324A34	MT039810	501	Complete	Yes	58	8.6	Chilo suppressalis CYP324A12	AYW35337	0	63
CYP324A39	MT039811	454	Complete	Yes	53	8.2	Parnassius apollo CYP324A29	AXB26390	0	57
CYP333A20	MT039812	497	Complete	No	57	9.2	Cnaphalocrocis medinalis CYP333A13	AJN91159	0	64
CYP341A29	MT039813	514	Complete	Yes	59	8.7	Spodoptera exigua CYP341A11	ASO98045	0	72
CYP354A24	MT039814	511	Complete	Yes	60	8.9	Helicoverpa armigera CYP354A3	AKP80585	0	70
CYP366A1	MT039815	500	Complete	Yes	57	8.9	Heortia vitessoides CYP366D1	QBA57454	0	65
CYP367A1	MT039816	501	Complete	Yes	57	9.2	Spodoptera littoralis CYP367A6	AFP20601	0	64
CYP367B1	MT039817	503	Complete	Yes	58	8	Heortia vitessoides CYP367B12	QBA57453	0	73
TMD: transmembrane domain

## Sheet: UGTs
Gene name	GenBank acc. no.	Length (aa)	ORF	SP	TMD	Mw (kDa)	pI	BLASTX best match
								Species/Protein name	GenBank acc. no.	E-value	Identity (%)
UGT33AL1	MT215178	521	Complete	Yes	Yes	59	6.6	Chilo suppressalis UGT33AF1	QBK47157	0	58
UGT33AF4	MT215179	454	5’ and 3’ missing	No	No	52	8	Helicoverpa armigera UGT33B11	AEW43113	0	68
UGT33AL2	MT215180	523	Complete	Yes	Yes	60	7.3	Helicoverpa armigera UGT33F2	AEW43116	0	61
UGT33AM1	MT215181	518	Complete	Yes	Yes	59	7.7	Chilo suppressalis UGT33AF1	QBK47157	0	56
UGT40AJ2	MT215182	518	Complete	Yes	Yes	59	8.1	Chilo suppressalis UGT40AJ1	QBK47165	0	65
UGT40AP2	MT215183	509	3’ missing	Yes	Yes	57	8.3	Chilo suppressalis UGT40AP1	QBK47173	0	60
UGT40AN6	MT215184	520	Complete	Yes	Yes	58	8.9	Chilo suppressalis UGT40AN1	QBK47171	0	61
UGT40AM2	MT215185	528	Complete	No	Yes	60	9.1	Chilo suppressalis UGT40AM1	QBK47170	0	63
UGT40AK4	MT215186	520	Complete	Yes	Yes	59	8.7	Chilo suppressalis UGT40AK2	QBK47167	0	65
UGT41G1	MT215187	514	Complete	Yes	Yes	57	9.3	Bombyx mori UGT41A2	NP_001243966	0	58
UGT42C7	MT215188	518	Complete	Yes	Yes	59	8.7	Spodoptera exigua UGT42C2	ANI22012	0	62
UGT44A15	MT215189	525	Complete	No	Yes	60	6.3	Helicoverpa armigera UGT44A2	AEW43138	0	80
UGT46A13	MT215190	531	Complete	Yes	Yes	60	7	Chilo suppressalis UGT46A9	QBK47178	0	70

## Sheet: AOXs
Gene name	GenBank acc. no.	Length (aa)	ORF	Mw (kDa)	pI	BLASTX best match
						Species/Protein name	GenBank acc. no.	E-value	Identity (%)
OfurAOX1	MN109599	1274	Complete	142	6.6	Ostrinia furnacalis AOX1	BAR64766	0	99
OfurAOX2	MN109600	1218	3’ missing	135	6.7	Ostrinia furnacalis AOX2	BAR64767	0	99
OfurAOX3	MN109601	1271	Complete	141	6.2	Ostrinia furnacalis AOX3	BAR64768	0	99
OfurAOX4	MN109602	1238	Complete	139	7.4	Ostrinia furnacalis AOX4, partial	BAR64769	0	99
OfurAOX5	MN109603	600	5’ missing	67	7.3	Ostrinia furnacalis AOX5, partial	BAR64770	0	100
OfurAOX6	MN109604	1267	Complete	139	6.4	Ostrinia furnacalis AOX6	BAR64771	0	99
